# Supplementary material for: Hygroscopy-induced nanoparticle reshuffling in ionic-gold-residue-stabilized gold suprananoparticles
Source: Royal Society of Chemistry journal article supplement (doi:10.1039/c8na00302e), 2019-01-01
Supplement: c8na00302e1.pdf [file c8na00302e1.pdf]

## Electronic supplementary information

# Hygroscopy-Induced Nanoparticle Reshuffling in the Ionic-Gold-Residue-Stabilized Gold Suprananoparticles

Sungmoon Choi,<sup>†</sup> Minyoung Lim,<sup>†</sup> Yanlu Zhao, and Junhua Yu\*

*Department of Chemistry Education, Seoul National University, 1 Gwanak-Ro, Gwanak-Gu, Seoul 08826, South Korea*

Address correspondence to junhua@snu.ac.kr

### Experimental methods

**Materials.** 4-nitrophenol ( $\geq 99\%$ ), sodium borohydride (powder,  $\geq 98.0\%$ ), gold(III) chloride trihydrate, sodium chloride and poly(ethyleneimine) solution (average Mn  $\sim 1,200$ , 50 wt. % in H<sub>2</sub>O) were purchased from Sigma-Aldrich and used without further purification. TEM grids (Carbon Grid Type-A, 300 Mesh, Cu) were purchased from TedPella.

**Instruments.** HRTEM images were obtained on a JEM 3010 high-resolution transmission electron microscope. Absorption spectra were obtained on a Sinco S-4100 with a kinetic model that enabled the time-resolved spectrum measurement. Zeta potentials and hydrodynamic radii were analyzed with a Zetasizer Nano 2000 (Malvern Instruments, USA).

**UV-Visible spectroscopy.** UV-visible spectra were obtained on SCINCO S-4100 Scan UV-visible spectrophotometer at the kinetic model, by which a full absorption spectrum was recorded at a 1200 ms interval. The kinetic data was obtained at the same time.

### Preparation of stock solutions

Polyethyleneimine (PEI) (2.4 mM) was prepared in deionized water and kept in a refrigerator.

Sodium borohydride stock solution (1 mg/mL). Sodium borohydride (3 mg) was dissolved in DI water (3 mL).

4-nitrophenol stock solution (0.14 M). 120 mg of 4-nitrophenol was dissolved in DI water (6 mL).

---

E-mail: junhua@snu.ac.kr

[†] These authors contributed equally to this work.

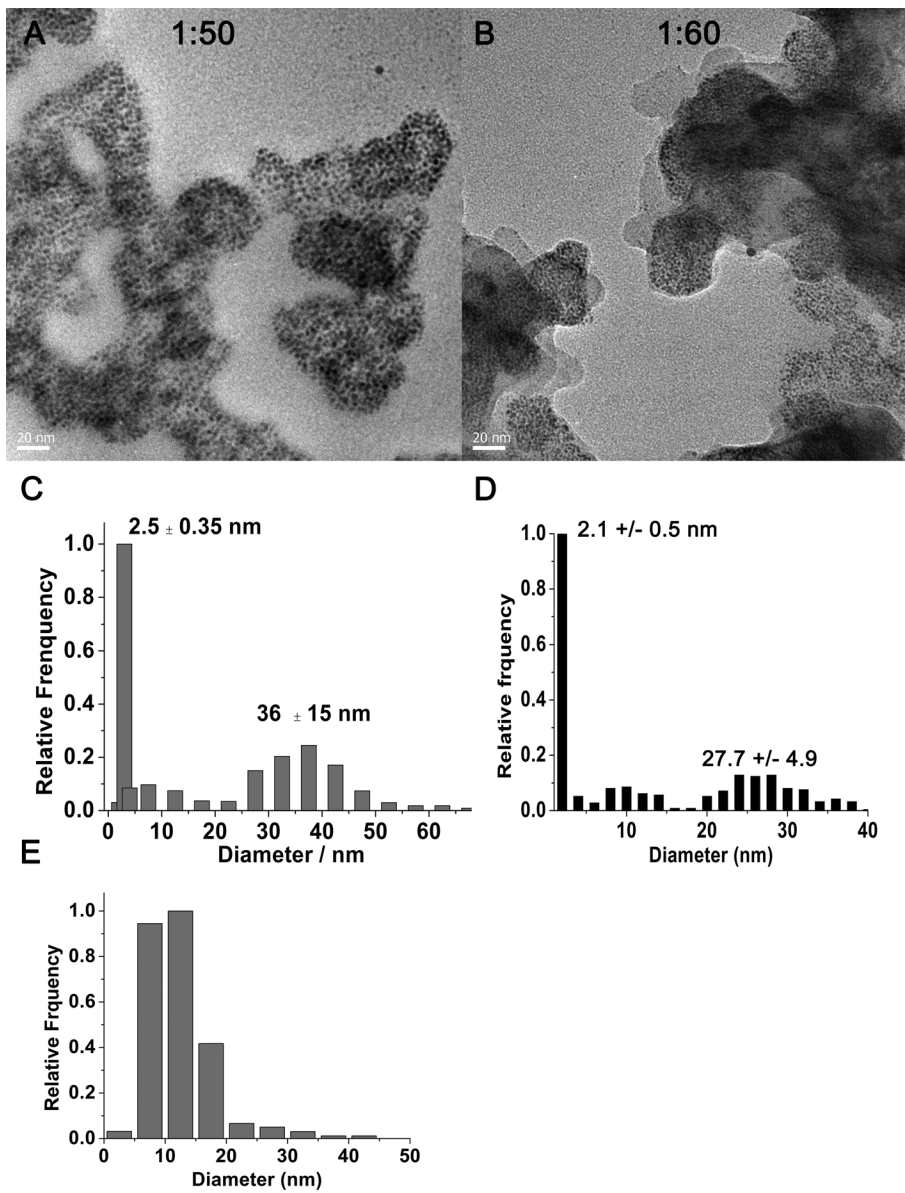

**Fig. S1** TEM images and size distribution of gold nanoparticles at a PEI/Au(III) molar ratio of 1:50 (A, C) and 1:60 (B, D). Scale bar: 20 nm. E, Size distribution of PEI/Au(III) molar ratio of 1:1.4.

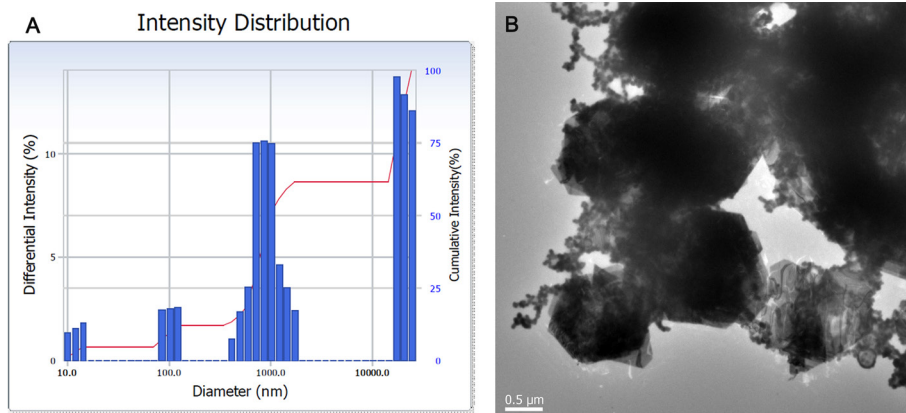

**Fig. S2** Hydrodynamic radii of the gold nanoparticles prepared at a PEI/Au(III) molar ratio of 1:40. A, DLS measurement of the nanoparticles. B, TEM image shows the aggregates of the suprananoparticles and the large gold plates.

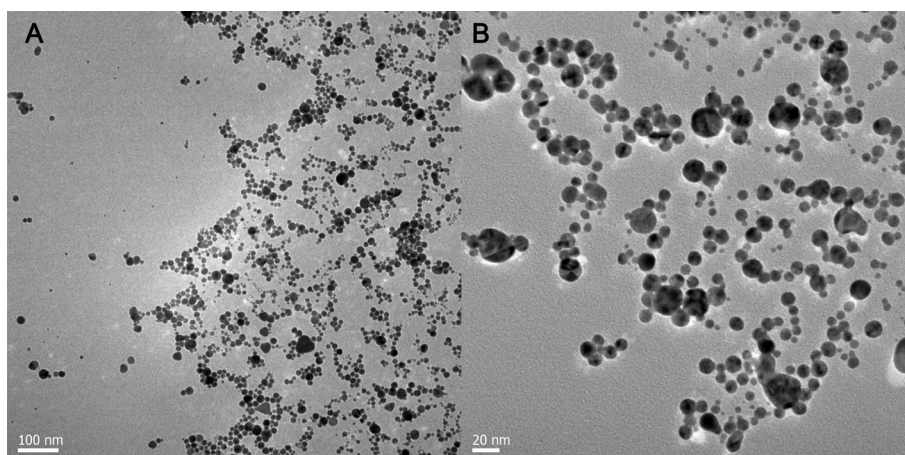

**Fig. S3** TEM images of the lyophilized gold nanoparticles ( PEI/Au(III) molar ratio of 1:40) in black. Scale bar: 100 nm (A) and 20 nm (B).
